# Supplementary material for: Conditional Loss of Hoxa5 Function Early after Birth Impacts on Expression of Genes with Synaptic Function
Source: Front Mol Neurosci. 2017 Nov 15;10:369. doi: 10.3389/fnmol.2017.00369 (PMC5695161; doi:10.3389/fnmol.2017.00369)
Supplement: Supplementary file 4 [file Table_4.XLSX]

## Sheet: Feuil1
Table S4: Functional annotation analysis with DAVID Bioinformatics Resources on differentially expressed genes between Hoxa5flox/flox; CMV-CreERT2+/- and Hoxa5flox/flox; CMV-CreERT2-/- at P21 in the brainstem
Functional Annotation Chart
Original database where the terms orient	Term	Number of genes involved in the term	P-value
KEGG_PATHWAY	Glutamatergic synapse	9	2,6E-7
UP_KEYWORDS	Calcium	17	5,6E-7
GOTERM_CC_DIRECT	synapse	13	5,7E-6
KEGG_PATHWAY	Calcium signaling pathway	9	7,7E-6
UP_KEYWORDS	Metal-binding	33	1,1E-5
UP_KEYWORDS	Synapse	10	2,7E-5
GOTERM_BP_DIRECT	long-term memory	5	2,7E-5
UP_KEYWORDS	Phosphoprotein	53	7,8E-5
UP_KEYWORDS	Developmental protein	15	8,6E-5
UP_KEYWORDS	Cell junction	12	1,5E-4
KEGG_PATHWAY	Retrograde endocannabinoid signaling	6	3,1E-4
UP_KEYWORDS	Calmodulin-binding	6	3,6E-4
GOTERM_MF_DIRECT	calmodulin binding	7	4,3E-4
KEGG_PATHWAY	Long-term potentiation	5	5,6E-4
UP_KEYWORDS	Glycoprotein	31	6,4E-4
GOTERM_CC_DIRECT	cell junction	12	6,9E-4
GOTERM_BP_DIRECT	multicellular organism development	15	7,5E-4
GOTERM_BP_DIRECT	central nervous system development	5	1,1E-3
GOTERM_BP_DIRECT	skin morphogenesis	3	1,4E-3
GOTERM_MF_DIRECT	protein binding	36	1,5E-3
KEGG_PATHWAY	Nicotine addiction	4	1,6E-3
KEGG_PATHWAY	GABAergic synapse	5	1,6E-3
KEGG_PATHWAY	Morphine addiction	5	2,0E-3
KEGG_PATHWAY	Oxytocin signaling pathway	6	2,1E-3
GOTERM_BP_DIRECT	positive regulation of transcription, DNA-templated	10	2,8E-3
GOTERM_BP_DIRECT	neuron development	4	3,3E-3
UP_KEYWORDS	Extracellular matrix	6	3,7E-3
UP_KEYWORDS	Kinase	10	3,8E-3
GOTERM_MF_DIRECT	metal ion binding	30	3,9E-3
GOTERM_CC_DIRECT	postsynaptic membrane	6	4,5E-3
UP_KEYWORDS	Neurogenesis	6	4,6E-3
GOTERM_MF_DIRECT	calmodulin-dependent protein kinase activity	3	5,5E-3
KEGG_PATHWAY	Proteoglycans in cancer	6	6,2E-3
UP_KEYWORDS	ATP-binding	14	6,3E-3
UP_SEQ_FEATURE	domain:EGF-like 8	3	7,0E-3
UP_SEQ_FEATURE	binding site:ATP	9	7,1E-3
UP_KEYWORDS	Postsynaptic cell membrane	5	7,4E-3
UP_SEQ_FEATURE	glycosylation site:N-linked (GlcNAc...)	28	8,3E-3
UP_KEYWORDS	Zinc	18	9,1E-3
UP_SEQ_FEATURE	region of interest:Necessary for interaction with CBLN3, and homotrimerization	2	9,6E-3
GOTERM_CC_DIRECT	collagen type I trimer	2	9,6E-3
UP_KEYWORDS	Alternative splicing	32	1,1E-2
GOTERM_BP_DIRECT	regulation of neuron differentiation	3	1,1E-2
GOTERM_MF_DIRECT	RNA polymerase II core promoter proximal region sequence-specific DNA binding	7	1,2E-2
GOTERM_BP_DIRECT	nervous system development	7	1,3E-2
KEGG_PATHWAY	Aldosterone synthesis and secretion	4	1,4E-2
UP_SEQ_FEATURE	metal ion-binding site:Calcium 2; via carbonyl oxygen	3	1,4E-2
KEGG_PATHWAY	ECM-receptor interaction	4	1,4E-2
GOTERM_MF_DIRECT	transcriptional activator activity, RNA polymerase II core promoter proximal region sequence-specific binding	6	1,5E-2
UP_KEYWORDS	Cell adhesion	7	1,5E-2
KEGG_PATHWAY	cGMP-PKG signaling pathway	5	1,7E-2
GOTERM_BP_DIRECT	intracellular signal transduction	7	1,7E-2
UP_SEQ_FEATURE	compositionally biased region:Poly-His	3	1,8E-2
UP_SEQ_FEATURE	nucleotide phosphate-binding region:ATP	11	1,8E-2
GOTERM_BP_DIRECT	skeletal system development	4	1,8E-2
INTERPRO	Transcription factor, basic helix-loop-helix, NeuroD	2	1,8E-2
INTERPRO	Neurogenic differentiation factor, domain of unknown function	2	1,8E-2
INTERPRO	Serine/threonine-protein kinase, active site	6	1,8E-2
GOTERM_CC_DIRECT	proteinaceous extracellular matrix	6	1,9E-2
KEGG_PATHWAY	Circadian entrainment	4	1,9E-2
PIR_SUPERFAMILY	basic helix-loop-helix transcription factor NeuroD	2	2,0E-2
KEGG_PATHWAY	Purine metabolism	5	2,0E-2
UP_KEYWORDS	Nucleotide-binding	15	2,0E-2
GOTERM_MF_DIRECT	extracellular matrix structural constituent	3	2,0E-2
KEGG_PATHWAY	Pancreatic secretion	4	2,0E-2
UP_SEQ_FEATURE	compositionally biased region:Poly-Gly	5	2,0E-2
GOTERM_BP_DIRECT	cranial nerve development	2	2,0E-2
GOTERM_CC_DIRECT	intracellular	15	2,1E-2
UP_SEQ_FEATURE	region of interest:Calmodulin-binding	3	2,3E-2
GOTERM_BP_DIRECT	brain development	5	2,5E-2
UP_KEYWORDS	Disulfide bond	22	2,7E-2
GOTERM_MF_DIRECT	kinase activity	9	2,7E-2
KEGG_PATHWAY	Cholinergic synapse	4	2,8E-2
UP_SEQ_FEATURE	region of interest:Autoinhibitory domain	2	2,9E-2
UP_SEQ_FEATURE	propeptide:N-terminal propeptide	2	2,9E-2
KEGG_PATHWAY	Amoebiasis	4	3,0E-2
GOTERM_BP_DIRECT	L-glutamate import	2	3,0E-2
GOTERM_BP_DIRECT	positive regulation of fibroblast apoptotic process	2	3,0E-2
GOTERM_MF_DIRECT	RNA polymerase II regulatory region sequence-specific DNA binding	5	3,1E-2
GOTERM_BP_DIRECT	response to drug	6	3,1E-2
GOTERM_MF_DIRECT	phosphoric diester hydrolase activity	3	3,1E-2
INTERPRO	Sodium	2	3,2E-2
INTERPRO	Sodium	2	3,2E-2
INTERPRO	Cytochrome P450, E-class, group I, CYP2A-like	2	3,2E-2
KEGG_PATHWAY	Focal adhesion	5	3,2E-2
UP_SEQ_FEATURE	metal ion-binding site:Calcium 2	3	3,2E-2
GOTERM_CC_DIRECT	sarcoplasmic reticulum	3	3,2E-2
UP_KEYWORDS	Serine/threonine-protein kinase	6	3,2E-2
UP_SEQ_FEATURE	propeptide:C-terminal propeptide	2	3,3E-2
COG_ONTOLOGY	Transcription / Cell division and chromosome partitioning	3	3,4E-2
GOTERM_BP_DIRECT	semicircular canal morphogenesis	2	3,5E-2
GOTERM_BP_DIRECT	neuromuscular process controlling balance	3	3,6E-2
INTERPRO	Protein kinase C-like, phorbol ester/diacylglycerol binding	3	3,7E-2
GOTERM_BP_DIRECT	phosphorylation	8	3,8E-2
GOTERM_BP_DIRECT	cell adhesion	7	3,9E-2
KEGG_PATHWAY	Platelet activation	4	4,0E-2
GOTERM_BP_DIRECT	cGMP catabolic process	2	4,0E-2
UP_KEYWORDS	Ligand-gated ion channel	3	4,1E-2
GOTERM_BP_DIRECT	heart morphogenesis	3	4,3E-2
GOTERM_CC_DIRECT	neuronal cell body	7	4,5E-2
UP_SEQ_FEATURE	domain:C2	3	4,5E-2
GOTERM_BP_DIRECT	learning	3	4,5E-2
UP_SEQ_FEATURE	domain:Fibrillar collagen NC1	2	4,7E-2
KEGG_PATHWAY	Long-term depression	3	4,9E-2
INTERPRO	Fibrillar collagen, C-terminal	2	4,9E-2
Functional Annotation Clustering
Annotation Cluster 1 Enrichment Score: 3.44
Original database where the terms orient	Term	Number of genes involved in the term	P-value
GOTERM_CC_DIRECT	synapse	13	5.7e-06
UP_KEYWORDS	synapse	10	2.7e-05
UP_KEYWORDS	Cell junction	12	0.00015
GOTERM_CC_DIRECT	Cell junction	12	0.00069
KEGG_PATHWAY	Nicotine addiction	4	0.0016
GOTERM_CC_DIRECT	Postsynaptic membrane	6	0.0045
UP_KEYWORDS	Postsynaptic cell membrane	5	0.0074
Annotation Cluster 2 Enrichment Score: 3.14
Original database where the terms orient	Term	Number of genes involved in the term	P-value
UP_KEYWORDS	Metal-binding	33	1.1e-05
GOTERM_MF_DIRECT	Metal ion binding	30	0.0039
UP_KEYWORDS	Zinc	18	0.0091
Annotation Cluster 3 Enrichment Score: 3
Original database where the terms orient	Term	Number of genes involved in the term	P-value
KEGG_PATHWAY	Retrograde endocannabinoid signaling	6	0.00031
KEGG_PATHWAY	GABAergic synapse	5	0.0016
KEGG_PATHWAY	Morphine addiction	5	0.002
Annotation Cluster 4 Enrichment Score: 2.97
Original database where the terms orient	Term	Number of genes involved in the term	P-value
KEGG_PATHWAY	Glutamatergic synapse	9	2.6e-07
KEGG_PATHWAY	Calcium signaling pathway	9	7.7e-06
KEGG_PATHWAY	Retrograde endocannabinoid signaling	6	0.00031
KEGG_PATHWAY	Long-term potentiation	5	0.00056
KEGG_PATHWAY	Oxytocin signaling pathway	6	0.0021
KEGG_PATHWAY	Aldosterone synthesis and secretion	4	0.014
KEGG_PATHWAY	cGMP-PKG signaling pathway	5	0.017
KEGG_PATHWAY	Circadian entrainment	4	0.019
KEGG_PATHWAY	Pancreatic secretion	4	0.02
KEGG_PATHWAY	Cholinergic synapse	4	0.028
Annotation Cluster 5 Enrichment Score: 2.67
Original database where the terms orient	Term	Number of genes involved in the term	P-value
UP_KEYWORDS	Calmodulin-binding	6	0.00036
GOTERM_MF_DIRECT	calmodulin binding	7	0.00043
GOTERM_MF_DIRECT	calmodulin-dependent protein kinase activity	3	0.0055
UP_SEQ_FEATURE	region of interest:Calmodulin-binding	3	0.023
Annotation Cluster 6 Enrichment Score: 2.4
Original database where the terms orient	Term	Number of genes involved in the term	P-value
UP_KEYWORDS	Developmental protein	15	8.6e-05
GOTERM_BP_DIRECT	multicellular organism development	15	0.00075
UP_KEYWORDS	Neurogenesis	6	0.0046
GOTERM_BP_DIRECT	nervous system development	7	0.013
GOTERM_MF_DIRECT	RNA polymerase II regulatory region sequence-specific DNA binding	5	0.031
COG_ONTOLOGY	Transcription / Cell division and chromosome partitioning	3	0.034
Annotation Cluster 7 Enrichment Score: 2.28
Original database where the terms orient	Term	Number of genes involved in the term	P-value
UP_KEYWORDS	Glycoprotein	31	0.00064
UP_SEQ_FEATURE	glycosylation site:N-linked (GlcNAc...)	28	0.0083
UP_KEYWORDS	Disulfide bond	22	0.027
Annotation Cluster 8 Enrichment Score: 2.07
Original database where the terms orient	Term	Number of genes involved in the term	P-value
GOTERM_BP_DIRECT	skin morphogenesis	3	0.0014
UP_KEYWORDS	Extracellular matrix	6	0.0037
KEGG_PATHWAY	ECM-receptor interaction	4	0.014
GOTERM_CC_DIRECT	proteinaceous extracellular matrix	6	0.019
KEGG_PATHWAY	Focal adhesion	5	0.032
Annotation Cluster 9 Enrichment Score: 2.01
Original database where the terms orient	Term	Number of genes involved in the term	P-value
GOTERM_BP_DIRECT	positive regulation of transcription, DNA-templated	10	0.0028
GOTERM_MF_DIRECT	RNA polymerase II core promoter proximal region sequence-specific DNA binding	7	0.012
GOTERM_MF_DIRECT	transcriptional activator activity, RNA polymerase II core promoter proximal region sequence-specific binding	6	0.015
UP_SEQ_FEATURE	compositionally biased region:Poly-His	3	0.018
Annotation Cluster 10 Enrichment Score: 1.83
Original database where the terms orient	Term	Number of genes involved in the term	P-value
UP_KEYWORDS	Kinase	10	0.0038
UP_KEYWORDS	ATP-binding	14	0.0063
UP_SEQ_FEATURE	binding site:ATP	9	0.0071
UP_SEQ_FEATURE	nucleotide phosphate-binding region:ATP	11	0.018
INTERPRO	Serine/threonine-protein kinase, active site	6	0.018
UP_KEYWORDS	Nucleotide-binding	15	0.02
GOTERM_MF_DIRECT	kinase activity	9	0.027
UP_KEYWORDS	Serine/threonine-protein kinase	6	0.032
GOTERM_BP_DIRECT	phosphorylation	8	0.038
Annotation Cluster 11 Enrichment Score: 1.79
Original database where the terms orient	Term	Number of genes involved in the term	P-value
UP_SEQ_FEATURE	domain:EGF-like 8	3	0.007
UP_KEYWORDS	Cell adhesion	7	0.015
GOTERM_BP_DIRECT	cell adhesion	7	0.039
Annotation Cluster 12 Enrichment Score: 1.21
Original database where the terms orient	Term	Number of genes involved in the term	P-value
KEGG_PATHWAY	Proteoglycans in cancer	6	0.0062
KEGG_PATHWAY	Amoebiasis	4	0.03
KEGG_PATHWAY	Focal adhesion	5	0.032
KEGG_PATHWAY	Platelet activation	4	0.04
